# Supplementary material
Source: Copernicus journal article supplement (doi:10.5194/bg-23-3347-2026)
Supplement: Supplementary file 1 [file bg-23-3347-2026-supplement.pdf]

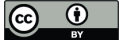

*Supplement of*

## **Sensitivity of a mechanistic photosynthesis model to tropical Andean species and environments**

**Sebastián González-Caro et al.**

*Correspondence to:* Sebastián González-Caro ([sebastian.gonzalez.caro@gmail.com](mailto:sebastian.gonzalez.caro@gmail.com))

The copyright of individual parts of the supplement might differ from the article licence.

5

10 **Supplement**

15

20

Figure S1. Comparison between observed and modeled photosynthesis and modeled diurnal variation of net CO<sub>2</sub> assimilation for montane and lowland species. (A) Relationship between observed and modeled daily carbon assimilation ( $A_{\text{net}}$ ) showing a strong agreement between both estimates. (B) Modeled diurnal variation of photosynthesis for montane species under environmental conditions at the 14°C site (blue) and the 22°C site (red). (C) Modeled diurnal variation of photosynthesis for lowland species under the same environmental conditions (blue = 14°C; red = 22°C).

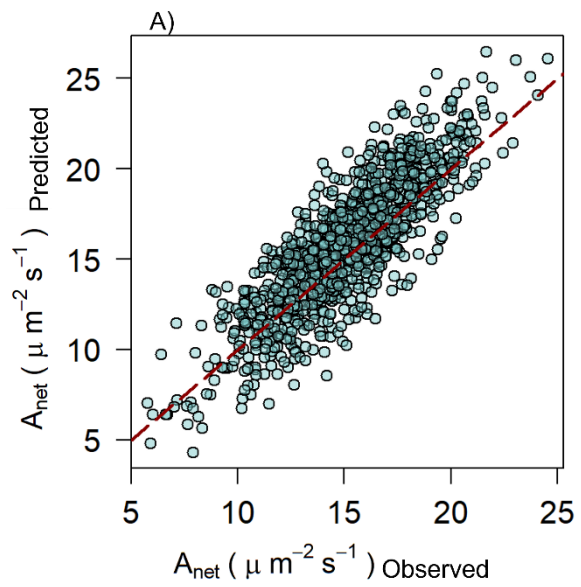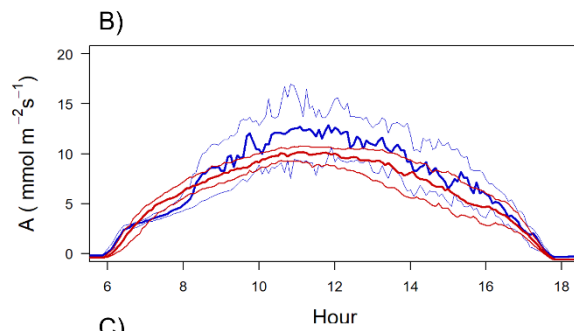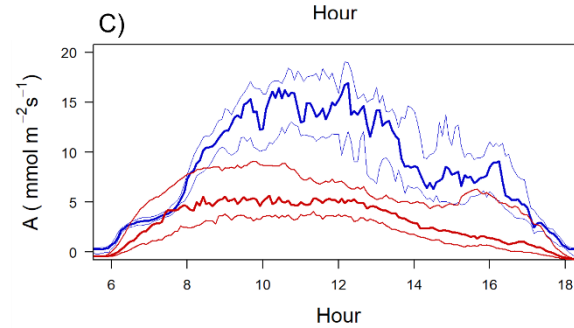

Figure S2. Boxplot of simulated parameter distribution of analysed species for  $V_{\text{cmax}}$  (a),  $J_{\text{max}}$  (b) and  $g_1$   
30 (b). Blue boxes represent montane species, and red boxes represent lowland species and the 14°C site (1)  
and at the 22°C site (2).

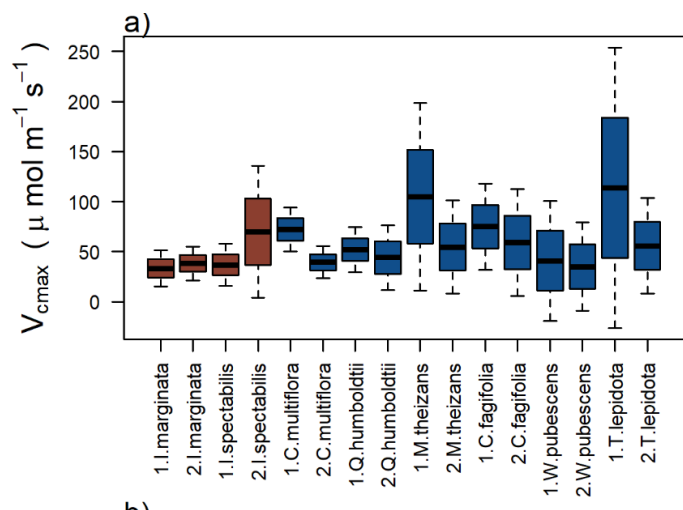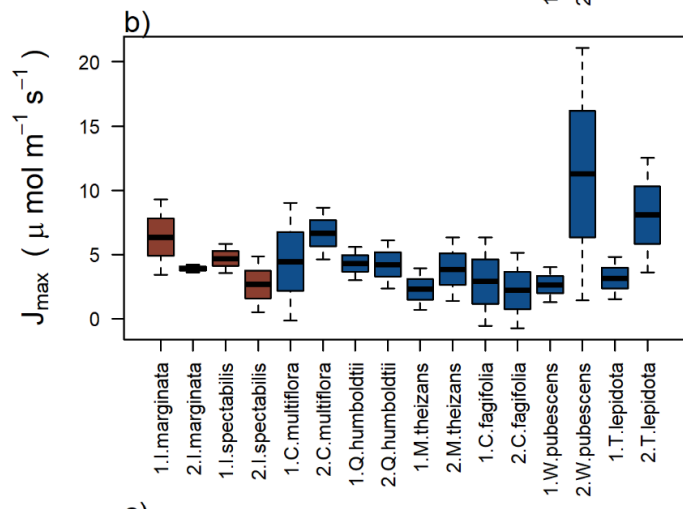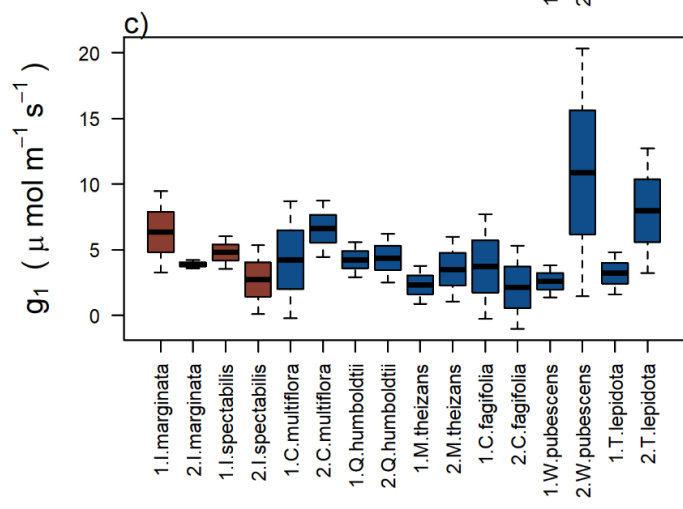

Figure S3. Residuals of observed and predicted leaf-level photosynthesis relative to intercellular CO<sub>2</sub> concentration (C<sub>i</sub>), photosynthetic active radiation (PAR), air temperature (T<sub>air</sub>), and vapor pressure deficit (VPD) for simulations at the 14°C (top row) and 22°C sites (bottom row). The plots also show the range of environmental conditions used in the simulations and sensitivity analyses: C<sub>i</sub> = 50–1200 μmol mol<sup>-1</sup>, PAR = 0–2000 μmol m<sup>-2</sup> s<sup>-1</sup>, T<sub>air</sub> = 10–30°C, and VPD = 0.2–2.5 kPa.

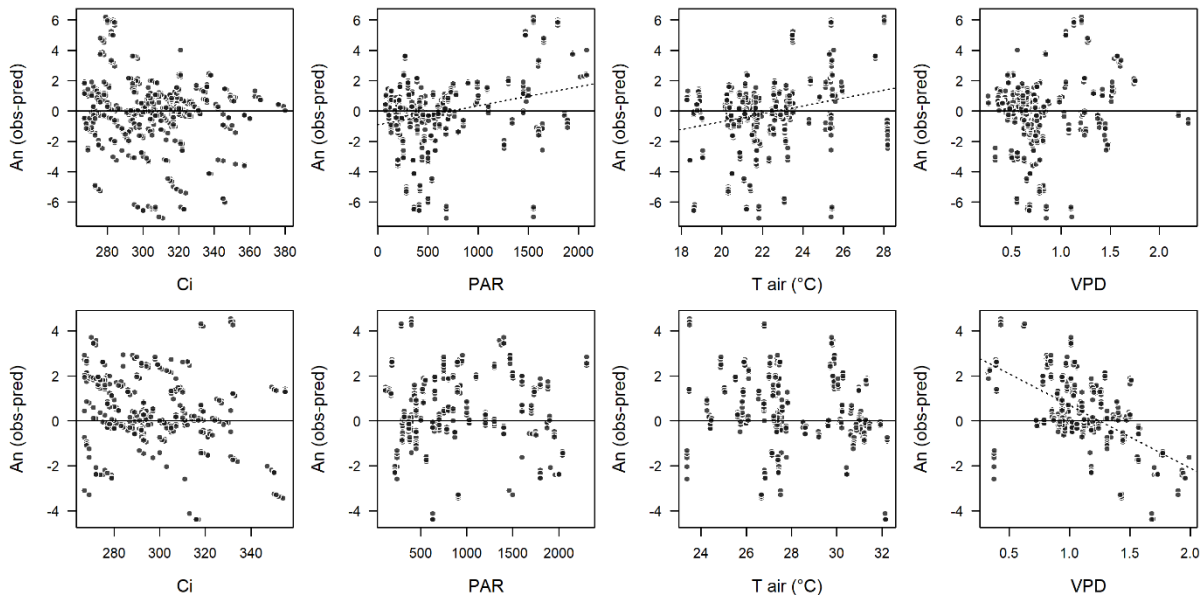

40
